# Supplementary material
Source: PubMed Central journal article supplement (PMC4757961)
Supplement: supp_glu315_Supplementary_Figures_19_12_14.pdf [file supp_glu315_Supplementary_Figures_19_12_14.pdf]

**SUPPLEMENTAL**

**Supplementary Table 1.** The percentage of scores by raters 1 and 2, for cohort 1 male calorie restricted and ad libitum fed C57BL/6J and DBA/2J mice, that fell into each score category (0, 0.5, 1) for each item of the frailty index.

| Frailty Index Item | Male DBA2/J<br>Calorie Restricted |      |      | Male DBA2/J<br><i>Ad Libitum</i> Fed |      |      | Male C57BL/6J<br>Calorie Restricted |      |      | Male C57BL/6J<br><i>Ad Libitum</i> Fed |      |      | Chi<br>Squared |
|--------------------|-----------------------------------|------|------|--------------------------------------|------|------|-------------------------------------|------|------|----------------------------------------|------|------|----------------|
|                    | 0                                 | 0.5  | 1    | 0                                    | 0.5  | 1    | 0                                   | 0.5  | 1    | 0                                      | 0.5  | 1    | P value        |
| Temperature Score  | 71.4                              | 14.3 | 14.3 | 57.1                                 | 42.9 |      | 100.0                               |      |      | 62.5                                   | 37.5 |      | 0.006          |
| Body Weight Score  | 85.7                              | 14.3 |      | 42.9                                 | 42.9 | 14.3 | 90.0                                | 10.0 |      | 12.5                                   | 12.5 | 75.0 | 0.000          |
| Alopecia           | 57.1                              | 42.9 |      | 56.3                                 | 43.8 |      | 95.0                                | 5.0  |      | 75.0                                   | 25.0 |      | 0.030          |
| Loss of fur colour | 100.0                             |      |      | 93.8                                 | 6.3  |      | 25.0                                | 75.0 |      | 43.8                                   | 56.3 |      | 0.000          |
| Dermatitis         | 100.0                             |      |      | 100.0                                |      |      | 100.0                               |      |      | 81.3                                   | 6.3  | 12.5 | NS             |
| Loss of whiskers   | 100.0                             |      |      | 75.0                                 | 12.5 | 12.5 | 90.0                                | 10.0 |      | 62.5                                   | 18.8 | 18.8 | NS             |
| Coat condition     | 35.7                              | 64.3 |      | 25.0                                 | 68.8 | 6.3  | 60.0                                | 40.0 |      | 43.8                                   | 31.3 | 25.0 | 0.020          |
| Tumours            | 100.0                             |      |      | 87.5                                 | 12.5 |      | 100.0                               |      |      | 100.0                                  |      |      | NS             |
| Distended abdomen  | 100.0                             |      |      | 87.5                                 | 12.5 |      | 95.0                                | 5.0  |      | 87.5                                   | 12.5 |      | NS             |
| Kyphosis           | 28.6                              | 50.0 | 21.4 | 37.5                                 | 31.3 | 31.3 | 45.0                                | 50.0 | 5.0  | 62.5                                   | 31.3 | 6.3  | NS             |
| Tail stiffening    | 35.7                              | 50.0 | 14.3 | 12.5                                 | 31.3 | 56.3 | 15.0                                | 65.0 | 20.0 | 25.0                                   | 56.3 | 18.8 | NS             |
| Gait disorders     | 100.0                             |      |      | 100.0                                |      |      | 100.0                               |      |      | 93.8                                   | 6.3  |      | NS             |
| Tremor             | 71.4                              | 28.6 |      | 75.0                                 | 25.0 |      | 95.0                                | 5.0  |      | 87.5                                   | 12.5 |      | NS             |

|                         |       |      |      |       |      |      |       |      |      |       |      |      |       |
|-------------------------|-------|------|------|-------|------|------|-------|------|------|-------|------|------|-------|
| Forelimb grip strength  | 35.7  | 50.0 | 14.3 | 18.8  | 31.3 | 50.0 | 30.0  | 60.0 | 10.0 | 25.0  | 50.0 | 25.0 | NS    |
| Body condition score    | 57.1  | 35.7 | 7.1  | 50.0  | 50.0 |      | 60.0  | 35.0 | 5.0  | 37.5  | 37.5 | 25.0 | NS    |
| Vestibular disturbance  | 78.6  | 21.4 |      | 81.3  | 18.8 |      | 50.0  | 45.0 | 5.0  | 68.8  | 25.0 | 6.3  | NS    |
| Hearing loss            |       | 28.6 | 71.4 |       | 31.3 | 68.8 | 70.0  | 10.0 | 20.0 | 50.0  | 18.8 | 31.3 | 0.000 |
| Cataracts               | 92.9  |      | 7.1  | 93.8  | 6.3  |      | 80.0  | 5.0  | 15.0 | 75.0  | 6.3  | 18.8 | NS    |
| Corneal capacity        | 100.0 |      |      | 93.8  | 6.3  |      | 85.0  | 15.0 |      | 75.0  | 12.5 | 12.5 | NS    |
| Eye discharge/swelling  | 78.6  | 14.3 | 7.1  | 37.5  | 56.3 | 6.3  | 60.0  | 35.0 | 5.0  | 68.8  | 25.0 | 6.3  | NS    |
| Microphthalmia          | 35.7  | 7.1  | 57.1 | 56.3  | 31.3 | 12.5 | 95.0  | 5.0  |      | 81.3  | 12.5 | 6.3  | 0.000 |
| Vision loss             | 50.0  | 14.3 | 35.7 | 31.3  | 25.0 | 43.8 | 20.0  | 55.0 | 25.0 | 25.0  | 43.8 | 31.3 | NS    |
| Menace reflex           | 78.6  | 21.4 |      | 75.0  | 25.0 |      | 90.0  | 10.0 |      | 68.8  | 18.8 | 12.5 | NS    |
| Nasal discharge         | 100.0 |      |      | 100.0 |      |      | 100.0 |      |      | 100.0 |      |      | NS    |
| Malocclusions           | 100.0 |      |      | 100.0 |      |      | 100.0 |      |      | 100.0 |      |      | NS    |
| Rectal prolapse         | 100.0 |      |      | 68.8  | 31.3 |      | 95.0  | 5.0  |      | 68.8  | 31.3 |      | 0.022 |
| Vaginal/penile prolapse | 57.1  | 42.9 |      | 50.0  | 50.0 |      | 80.0  | 20.0 |      | 75.0  | 25.0 |      | NS    |
| Diarrhoea               | 100.0 |      |      | 100.0 |      |      | 100.0 |      |      | 100.0 |      |      | NS    |
| Breathing rate/depth    | 42.9  | 35.7 | 21.4 | 43.8  | 50.0 | 6.3  | 80.0  | 20.0 |      | 75.0  | 12.5 | 12.5 | NS    |
| Mouse grimace scale     | 64.3  | 14.3 | 21.4 | 50.0  | 25.0 | 25.0 | 55.0  | 40.0 | 5.0  | 43.8  | 37.5 | 18.8 | NS    |
| Pilo erection           | 21.4  | 78.6 |      | 18.8  | 81.3 |      | 65.0  | 35.0 |      | 56.3  | 43.8 |      | 0.007 |

**Supplementary Table 2.** The percentage of scores by raters 1 and 2, for cohort 1 female calorie restricted and ad libitum fed C57BL/6J and DBA2/J mice, that fell into each score category (0, 0.5, 1) for each item of the frailty index.

| Frailty Index Score    | Female DBA2/J<br>Calorie Restricted |      |      | Female DBA2/J<br><i>Ad Libitum</i> Fed |      |      | Female C57BL/6J<br>Calorie Restricted |      |      | Female C57BL/6J<br><i>Ad Libitum</i> Fed |      |       | Chi<br>Squared |
|------------------------|-------------------------------------|------|------|----------------------------------------|------|------|---------------------------------------|------|------|------------------------------------------|------|-------|----------------|
|                        | 0                                   | 0.5  | 1    | 0                                      | 0.5  | 1    | 0                                     | 0.5  | 1    | 0                                        | 0.5  | 1     | P value        |
| Temperature Score      | 100.0                               |      |      | 85.7                                   | 14.3 |      | 82.4                                  | 17.6 |      | 80.0                                     | 10.0 | 10.0  | 0.017          |
| Body Weight Score      | 90.0                                | 10.0 |      | 25.0                                   | 25.0 | 50.0 | 47.4                                  | 42.1 | 10.5 |                                          |      | 100.0 | 0.000          |
| Alopecia               | 85.0                                | 15.0 |      | 61.1                                   | 38.9 |      | 60.0                                  | 35.0 | 5.0  | 50.0                                     | 27.3 | 22.7  | 0.027          |
| Loss of fur colour     | 100.0                               |      |      | 100.0                                  |      |      | 65.0                                  | 35.0 |      | 63.6                                     | 31.8 | 4.5   | 0.005          |
| Dermatitis             | 100.0                               |      |      | 100.0                                  |      |      | 100.0                                 |      |      | 90.9                                     | 9.1  |       | NS             |
| Loss of whiskers       | 100.0                               |      |      | 94.4                                   | 5.6  |      | 90.0                                  | 10.0 |      | 95.5                                     | 4.5  |       | NS             |
| Coat condition         | 40.0                                | 60.0 |      | 38.9                                   | 61.1 |      | 95.0                                  | 5.0  |      | 45.5                                     | 50.0 | 4.5   | 0.003          |
| Tumours                | 100.0                               |      |      | 100.0                                  |      |      | 95.0                                  | 5.0  |      | 100.0                                    |      |       | NS             |
| Distended abdomen      | 100.0                               |      |      | 100.0                                  |      |      | 85.0                                  | 5.0  | 10.0 | 68.2                                     | 31.8 |       | 0.001          |
| Kyphosis               | 40.0                                | 45.0 | 15.0 | 38.9                                   | 55.6 | 5.6  | 55.0                                  | 45.0 |      | 77.3                                     | 22.7 |       | 0.048          |
| Tail stiffening        | 25.0                                | 65.0 | 10.0 | 11.1                                   | 66.7 | 22.2 | 30.0                                  | 60.0 | 10.0 | 31.8                                     | 59.1 | 9.1   | NS             |
| Gait disorders         | 95.0                                | 5.0  |      | 100.0                                  |      |      | 100.0                                 |      |      | 100.0                                    |      |       | NS             |
| Tremor                 | 50.0                                | 50.0 |      | 77.8                                   | 22.2 |      | 95.0                                  | 5.0  |      | 100.0                                    |      |       | 0.000          |
| Forelimb grip strength | 40.0                                | 60.0 |      | 38.9                                   | 38.9 | 22.2 | 40.0                                  | 55.0 | 5.0  | 63.6                                     | 31.8 | 4.5   | NS             |

|                         |       |      |      |       |      |      |       |      |      |       |      |      |       |
|-------------------------|-------|------|------|-------|------|------|-------|------|------|-------|------|------|-------|
| Body condition score    | 50.0  | 35.0 | 15.0 | 44.4  | 55.6 |      | 60.0  | 35.0 | 5.0  | 59.1  | 31.8 | 9.1  | NS    |
| Vestibular disturbance  | 90.0  | 10.0 |      | 83.3  | 16.7 |      | 75.0  | 20.0 | 5.0  | 77.3  | 18.2 | 4.5  | NS    |
| Hearing loss            | 5.0   | 30.0 | 65.0 | 6.3   | 18.8 | 75.0 | 85.0  | 10.0 | 5.0  | 72.7  | 13.6 | 13.6 | 0.000 |
| Cataracts               | 90.0  |      | 10.0 | 88.9  |      | 11.1 | 85.0  | 5.0  | 10.0 | 90.9  |      | 9.1  | NS    |
| Corneal capacity        | 100.0 |      |      | 100.0 |      |      | 95.0  | 5.0  |      | 90.9  | 9.1  |      | NS    |
| Eye discharge/swelling  | 65.0  | 30.0 | 5.0  | 44.4  | 44.4 | 11.1 | 65.0  | 30.0 | 5.0  | 50.0  | 40.9 | 9.1  | NS    |
| Microphthalmia          | 75.0  | 10.0 | 15.0 | 66.7  | 11.1 | 22.2 | 50.0  | 45.0 | 5.0  | 50.0  | 22.7 | 27.3 | NS    |
| Vision loss             | 35.0  | 40.0 | 25.0 | 38.9  | 44.4 | 16.7 | 45.0  | 35.0 | 20.0 | 36.4  | 54.5 | 9.1  | NS    |
| Menace reflex           | 90.0  | 10.0 |      | 83.3  | 16.7 |      | 85.0  | 15.0 |      | 86.4  | 13.6 |      | NS    |
| Nasal discharge         | 100.0 |      |      | 100.0 |      |      | 100.0 |      |      | 100.0 |      |      | NS    |
| Malocclusions           | 100.0 |      |      | 100.0 |      |      | 100.0 |      |      | 100.0 |      |      | NS    |
| Rectal prolapse         | 100.0 |      |      | 100.0 |      |      | 100.0 |      |      | 100.0 |      |      | NS    |
| Vaginal/penile prolapse | 85.0  | 15.0 |      | 100.0 |      |      | 100.0 |      |      | 95.5  | 4.5  |      | NS    |
| Diarrhoea               | 100.0 |      |      | 100.0 |      |      | 100.0 |      |      | 100.0 |      |      | NS    |
| Breathing rate/depth    | 65.0  | 35.0 |      | 38.9  | 61.1 |      | 80.0  | 20.0 |      | 86.4  | 13.6 |      | 0.008 |
| Mouse grimace scale     | 80.0  | 10.0 | 10.0 | 61.1  | 33.3 | 5.6  | 80.0  | 20.0 |      | 63.6  | 36.4 |      | NS    |
| Pilo erection           | 35.0  | 65.0 |      | 11.1  | 88.9 |      | 90.0  | 10.0 |      | 81.8  | 18.2 |      | NS    |

**Supplementary Table 3.** The percentage of scores by raters 1 and 2, for cohort 2 male C57BL/6J mice fed a control or resveratrol-containing diet, that fell into each score category (0, 0.5, 1) for each item of the frailty index.

| Frailty Index Score    | Male C57BL/6J Mice with Resveratrol Diet |      |       | Male C57BL/6J Mice with Control Diet |      |       | Chi Squared |
|------------------------|------------------------------------------|------|-------|--------------------------------------|------|-------|-------------|
|                        | 0                                        | 0.5  | 1     | 0                                    | 0.5  | 1     | P value     |
| Body Weight Score      |                                          |      | 100.0 |                                      |      | 100.0 | NS          |
| Alopecia               | 100.0                                    |      |       | 100.0                                |      |       | NS          |
| Loss of fur colour     | 50.0                                     | 50.0 |       | 25.0                                 | 71.9 | 3.1   | NS          |
| Dermatitis             | 100.0                                    |      |       | 100.0                                |      |       | NS          |
| Loss of whiskers       | 100.0                                    |      |       | 100.0                                |      |       | NS          |
| Coat condition         | 38.9                                     | 61.1 |       | 37.5                                 | 59.4 | 3.1   | NS          |
| Tumours                | 100.0                                    |      |       | 100.0                                |      |       | NS          |
| Distended abdomen      | 72.2                                     | 27.8 |       | 62.5                                 | 37.5 |       | NS          |
| Kyphosis               | 88.9                                     | 11.1 |       | 71.9                                 | 25.0 | 3.1   | NS          |
| Tail stiffening        | 33.3                                     | 38.9 | 27.8  | 18.8                                 | 59.4 | 21.9  | NS          |
| Gait disorders         | 94.4                                     | 5.6  |       | 100.0                                |      |       | NS          |
| Tremor                 | 100.0                                    |      |       | 93.8                                 | 6.3  |       | NS          |
| Forelimb grip strength | 33.3                                     | 44.4 | 22.2  | 22.6                                 | 41.9 | 35.5  | NS          |
| Body condition score   | 55.6                                     | 33.3 | 11.1  | 46.9                                 | 34.4 | 18.8  | NS          |

|                         |       |      |      |       |      |      |       |
|-------------------------|-------|------|------|-------|------|------|-------|
| Vestibular disturbance  | 50.0  | 50.0 |      | 31.3  | 56.3 | 12.5 | NS    |
| Hearing loss            | 61.1  | 22.2 | 16.7 | 50.0  | 26.7 | 23.3 | NS    |
| Cataracts               | 94.4  | 5.6  |      | 100.0 |      |      | NS    |
| Corneal capacity        | 100.0 |      |      | 65.6  | 34.4 |      | 0.005 |
| Eye discharge/swelling  | 55.6  | 44.4 |      | 56.3  | 37.5 | 6.3  | NS    |
| Microphthalmia          | 94.4  | 5.6  |      | 96.9  | 3.1  |      | NS    |
| Vision loss             | 5.6   | 38.9 | 55.6 | 12.9  | 38.7 | 48.4 | NS    |
| Menace reflex           | 55.6  | 44.4 |      | 48.4  | 41.9 | 9.7  | NS    |
| Nasal discharge         | 94.4  | 5.6  |      | 100.0 |      |      | NS    |
| Malocclusions           | 100.0 |      |      | 100.0 |      |      | NS    |
| Rectal prolapse         | 100.0 |      |      | 100.0 |      |      | NS    |
| Vaginal/penile prolapse | 100.0 |      |      | 100.0 |      |      | NS    |
| Diarrhoea               | 100.0 |      |      | 100.0 |      |      | NS    |
| Breathing rate/depth    | 38.9  | 61.1 |      | 18.8  | 75.0 | 6.3  | NS    |
| Mouse grimace scale     | 50.0  | 50.0 |      | 34.4  | 65.6 |      | NS    |
| Pilo erection           | 88.9  | 11.1 |      | 81.3  | 18.8 |      | NS    |
